# Supplementary material
Source: PubMed Central journal article supplement (PMC5024573)
Supplement: NIHMS810876-supplement-SI.pdf [file NIHMS810876-supplement-SI.pdf]

## Supporting Information

### **6-Bromo-7-hydroxy-3-methylcoumarin (mBhc) is an efficient multi-photon labile protecting group for thiol caging and three-dimensional chemical patterning**

M. Mohsen Mahmoodi<sup>1</sup>, Stephanie A. Fisher<sup>2</sup>, Roger Y. Tam<sup>2</sup>, Philip C. Goff<sup>1</sup>, Reid Anderson, Jane E. Wissinger<sup>1</sup>, David A. Blank, Molly S. Shoichet<sup>2</sup>, and Mark D. Distefano<sup>1\*</sup>

<sup>1</sup>Department of Chemistry, University of Minnesota, Minneapolis, Minnesota, 55455, USA

<sup>2</sup>Department of Chemical Engineering & Applied Chemistry, Donnelly Centre for Cellular & Biomolecular Research, University of Toronto, Toronto, Ontario, M5S3E1 Canada

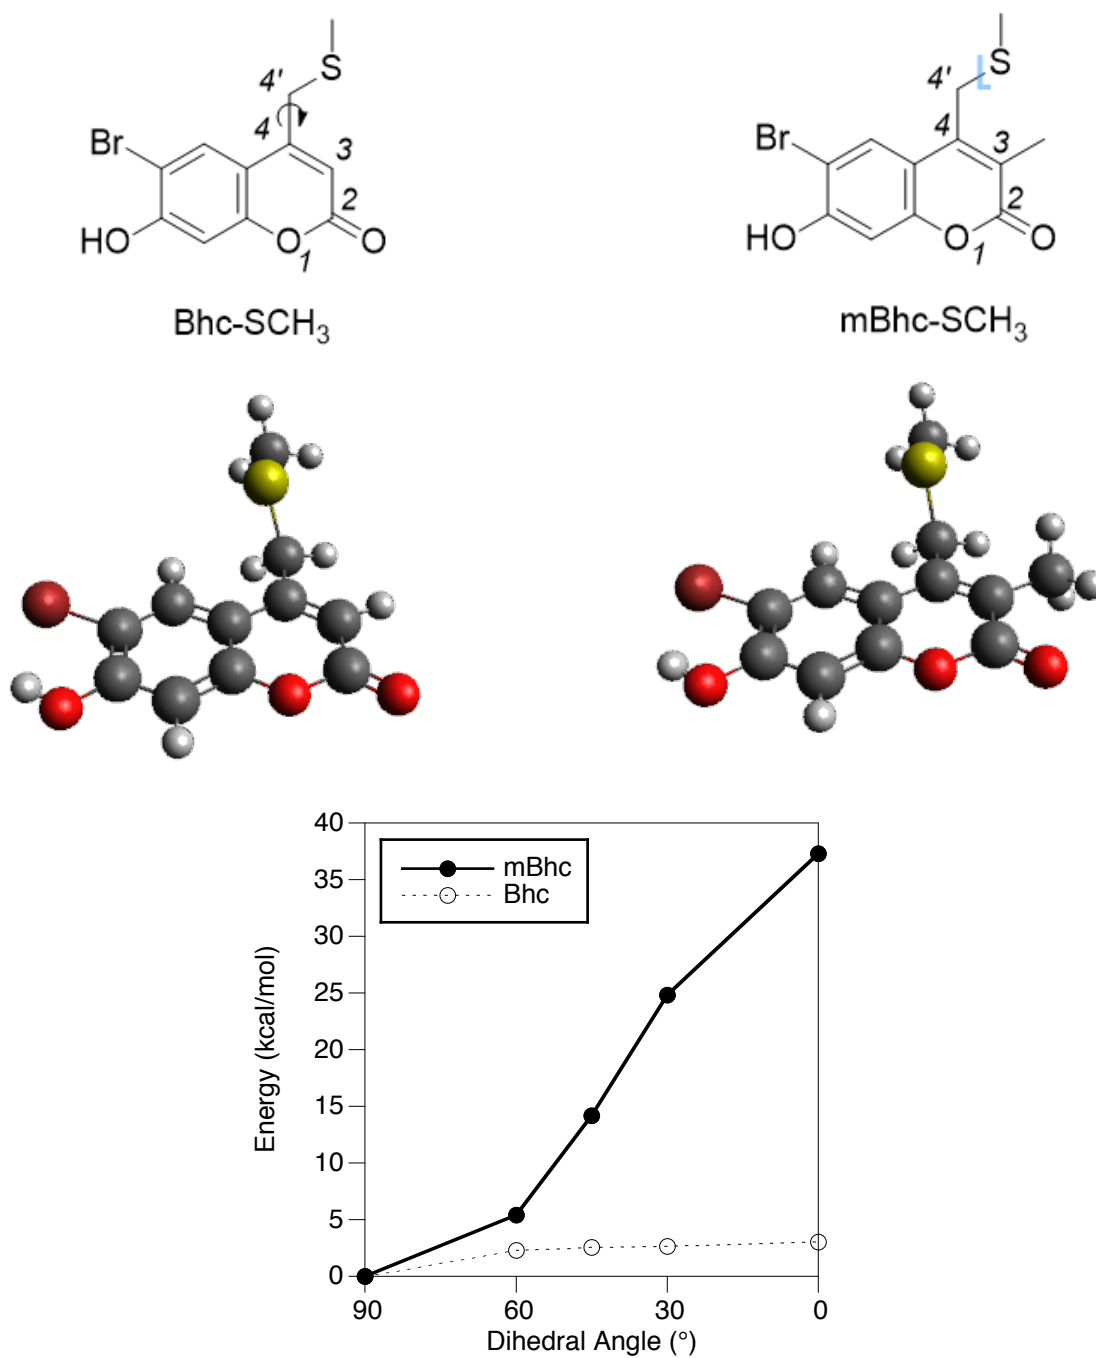

**Figure S1.** Computational analysis of the conformational energies of Bhc-SCH<sub>3</sub> and mBhc-SCH<sub>3</sub> showing the lowest energy conformer in each case, determined using Gaussian. A plot of energy versus dihedral angle (for the exocyclic thioether bond) is shown below. The conformations shown above in line angle form have dihedral angles for the C3-C4-C4'-S bond of 0° while the conformations shown in ball and stick form have dihedral angles for the C3-C4-C4'-S bond of 90° (lowest energy conformers).

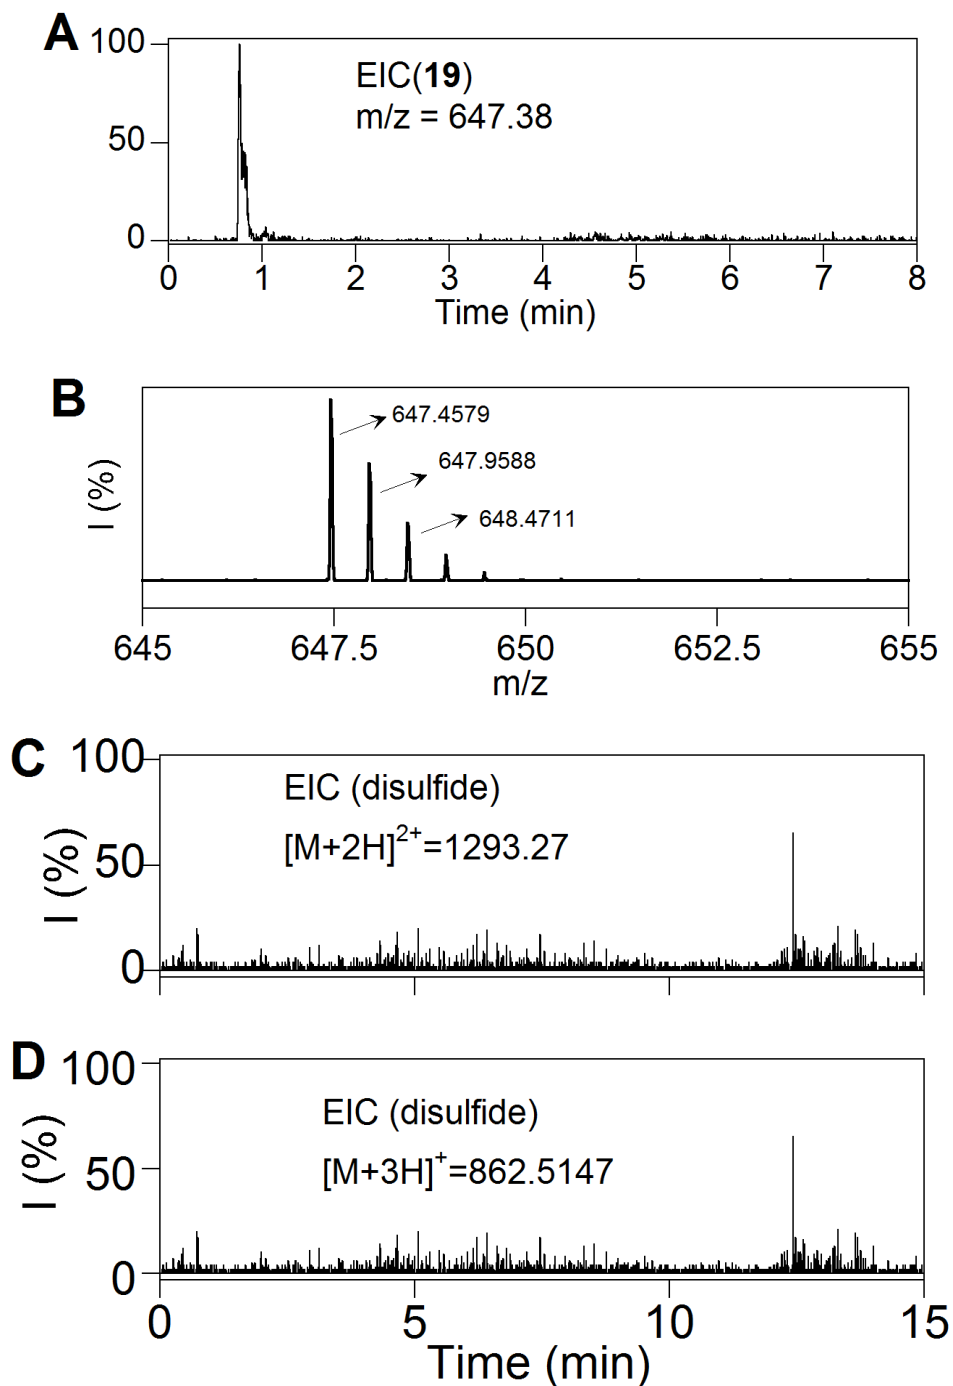

**Figure S2.** LC-MS analysis of a photolysis of **18** to probe for the formation of a disulfide-linked dimer. (A) EIC chromatogram ( $m/z = 647.45$ , calcd for  $[M + 2H]^{2+} = 647.39$ ) of a  $7.5 \mu\text{M}$  solution of **18** after 60 s irradiation at 365 nm, and (B) is the corresponding mass spectrum. 0.5 mass unit difference between the peaks clearly shows the observed ion has a +2 charge thus corresponds to the free thiol containing peptide with the expected mass and not the disulfide. (C) and (D) are EIC chromatograms corresponding to the  $[M+2H]^{2+}$  and  $[M+3H]^{3+}$  ions of the possible formed disulfide. This data clearly shows the absence of any significant disulfide bond formation in the photolysis reaction.

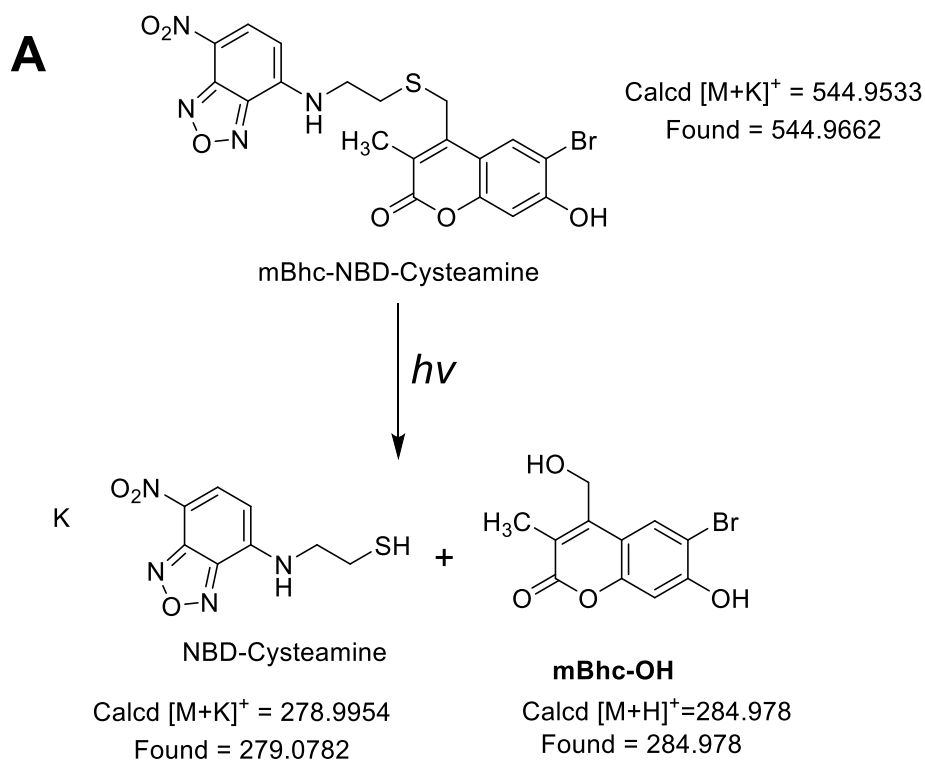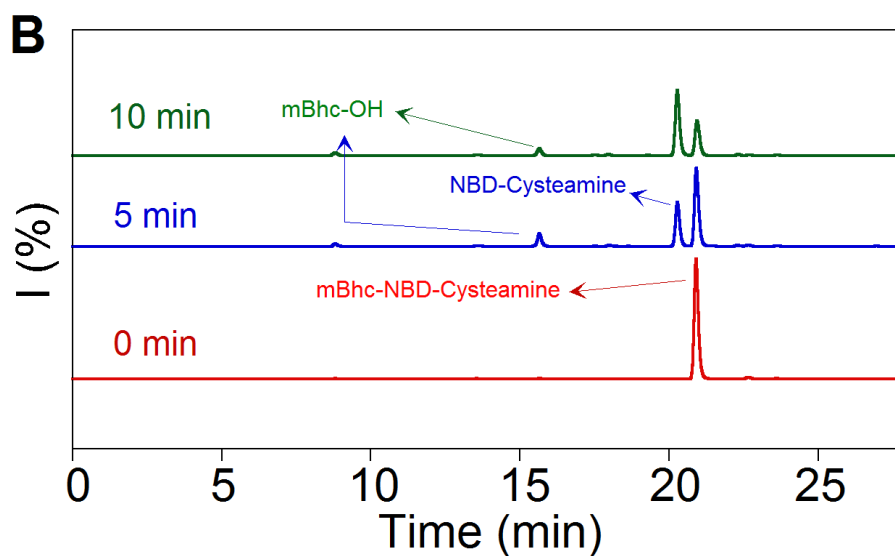

**Figure S3.** Analysis of the photolysis of mBhc-NBD-Cysteamine. (A) Scheme showing photo-triggered uncaging of mBhc-protected cysteamine. (B) fluorescence HPLC traces representing time-course photolysis of mBhc-protected cysteamine. These results show clean conversion of the caged peptide to the free thiol with no appearance of any unexpected byproducts. Each peak was isolated and analyzed by ESI-MS confirming that the observed masses were in agreement with the calculated values. mBhc-OH produced in the photolysis reaction was also purified by preparative RP-HPLC and characterized by LC-MS and NMR (See Figure S5).

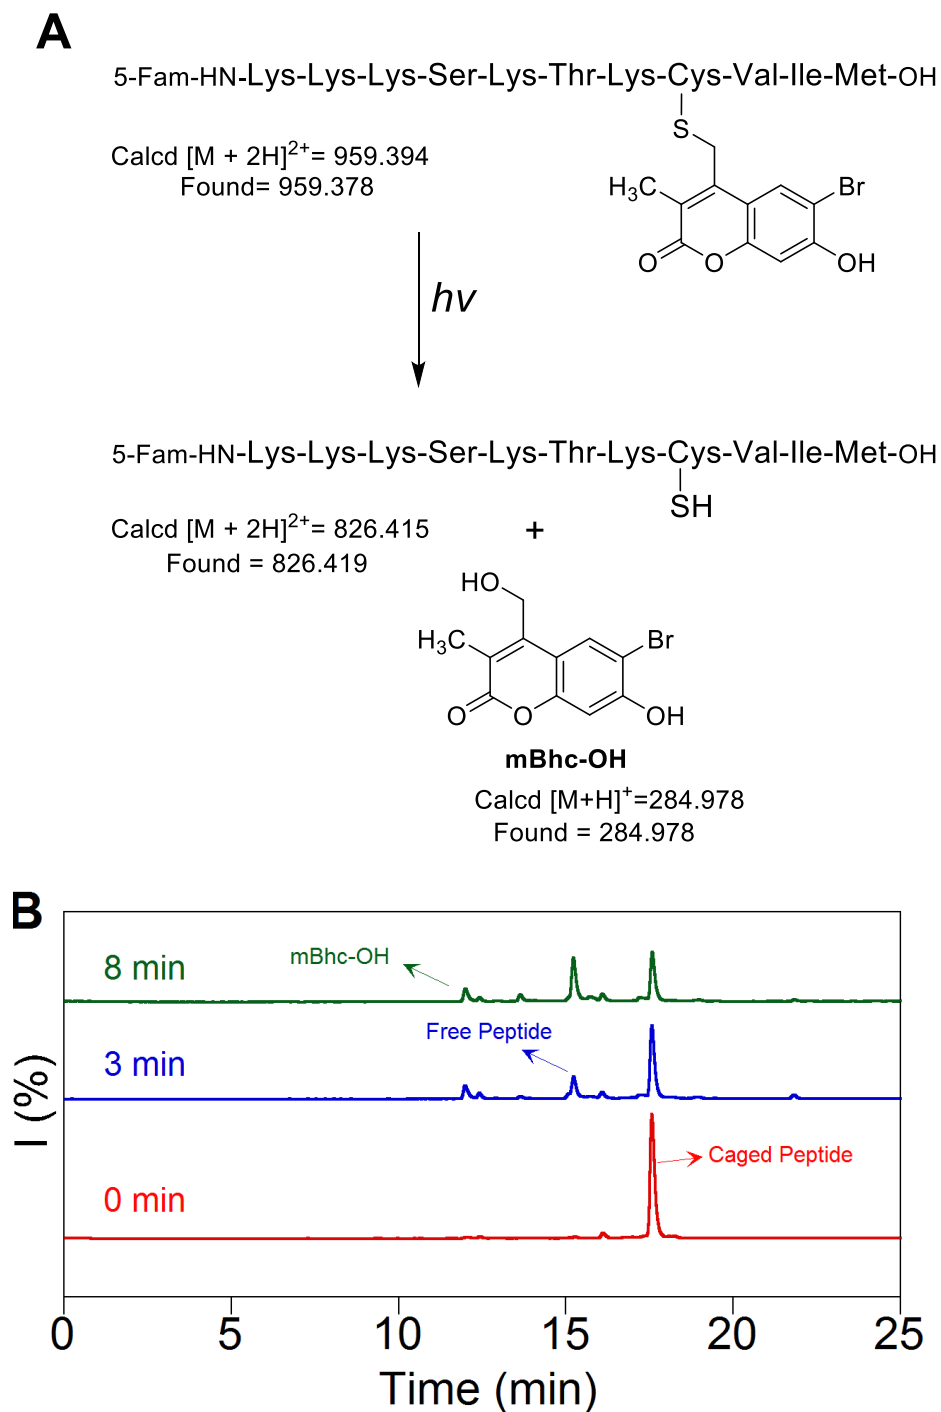

**Figure S4.** Analysis of the photolysis of a 5-Fam-labeled peptide containing a mBhc-protected cysteine. (A) Scheme showing photo-triggered uncaging of mBhc-protected 5-Fam labeled K-Ras peptide. (B) fluorescence HPLC traces representing the time-course of photolysis of 5-Fam-KKKSKTKC(mBhc)VIM. These results show clean conversion of caged peptide to the free compound with minimal byproduct formation. Each peak was isolated and analyzed by ESI-MS confirming that the observed masses were completely in agreement with the calculated values.

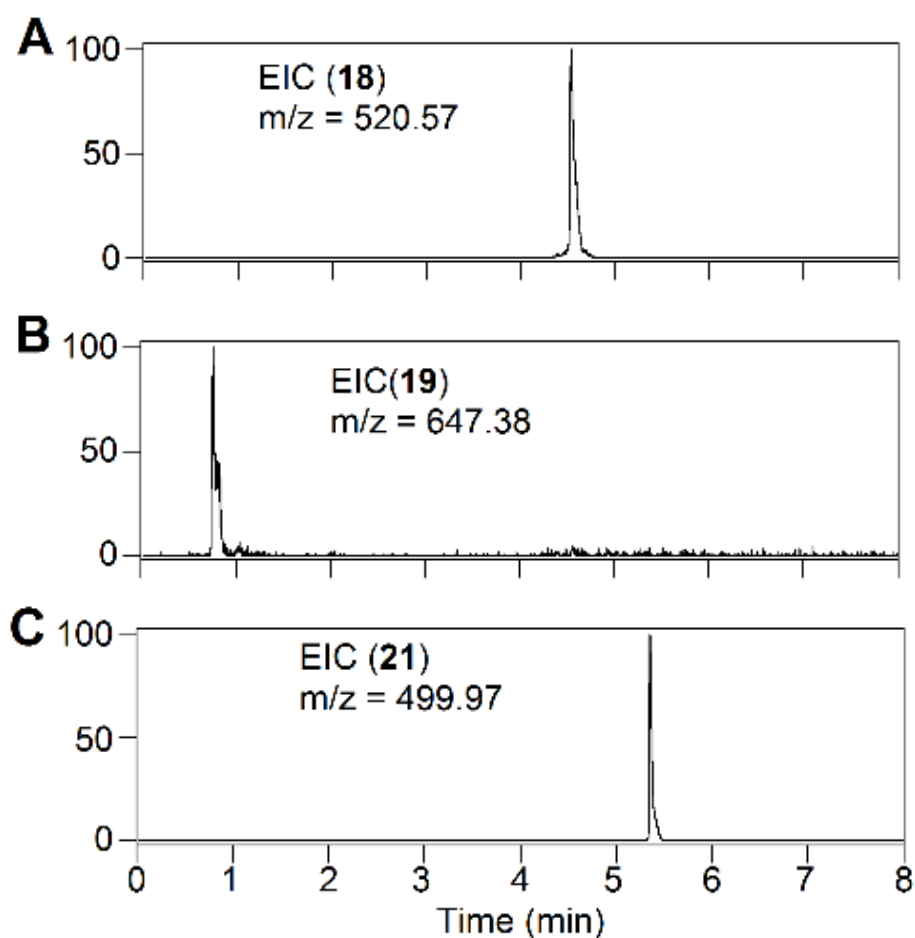

**Figure S5.** Analysis of a photolysis reaction of **18** showing the formation of the uncaged product and its subsequent enzymatic prenylation by PFTase. (A) EIC chromatogram (m/z = 520.57, calcd for  $[M + 3H]^{3+} = 520.58$ ) of a 7.5  $\mu\text{M}$  solution of **18** in a prenylation buffer containing PFTase with no irradiation (B) EIC chromatogram (m/z = 647.38, calcd for  $[M + 2H]^{2+} = 647.39$ ) of a 7.5  $\mu\text{M}$  solution of **18** after 5 min irradiation at 800 nm in prenylation buffer without any PFTase, indicates the generation of free peptide **19**, (C) EIC chromatogram (m/z = 499.97, calcd for  $[M + 3H]^{3+} = 499.99$ ) of a 7.5  $\mu\text{M}$  of **18** after 5 min irradiation at 800 nm in presence of PFTase indicates the formation of farnesylated peptide **19**.

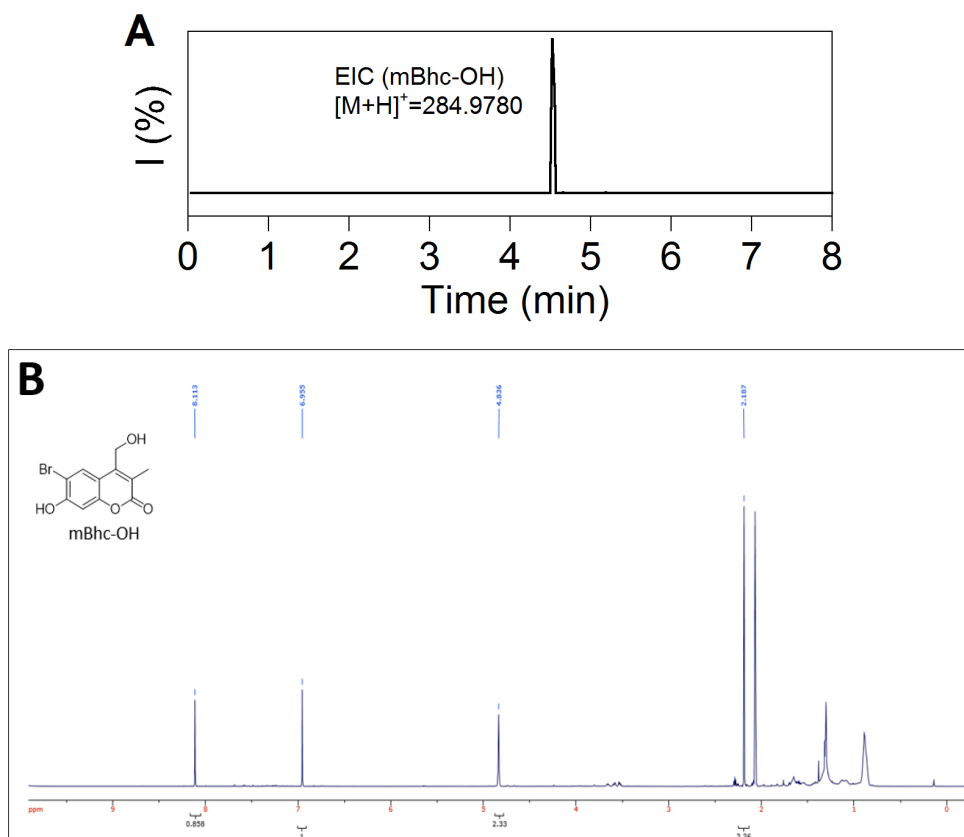

**Figure S6.** Characterization of mBhc-OH generated in the photolysis reaction and isolated via preparatory RP-HPLC. (A) EIC chromatogram showing high purity of the sample and confirming the observed mass exactly matches with the calculated one ( $[M+H]^+$  *cacd,obs* = 284.978). (B)  $^1\text{H}$ NMR of the isolated mBhc-OH obtained in deuterated acetone.

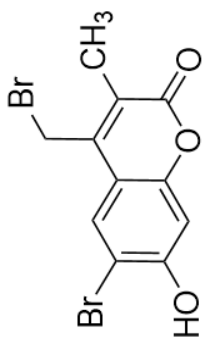

3a

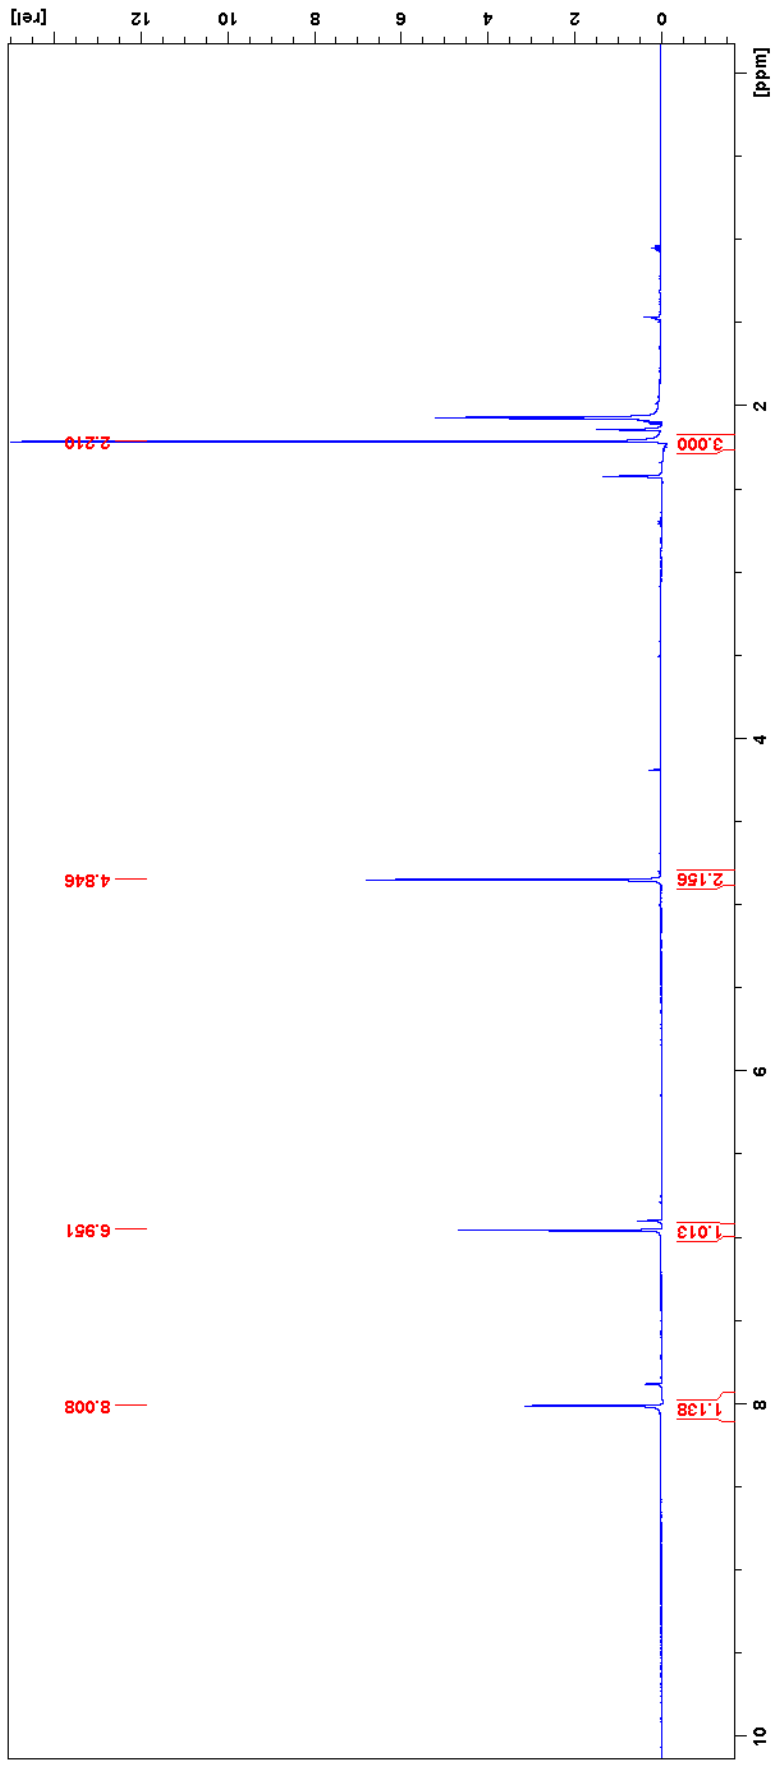



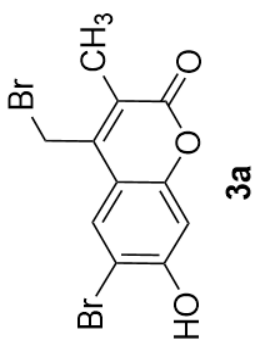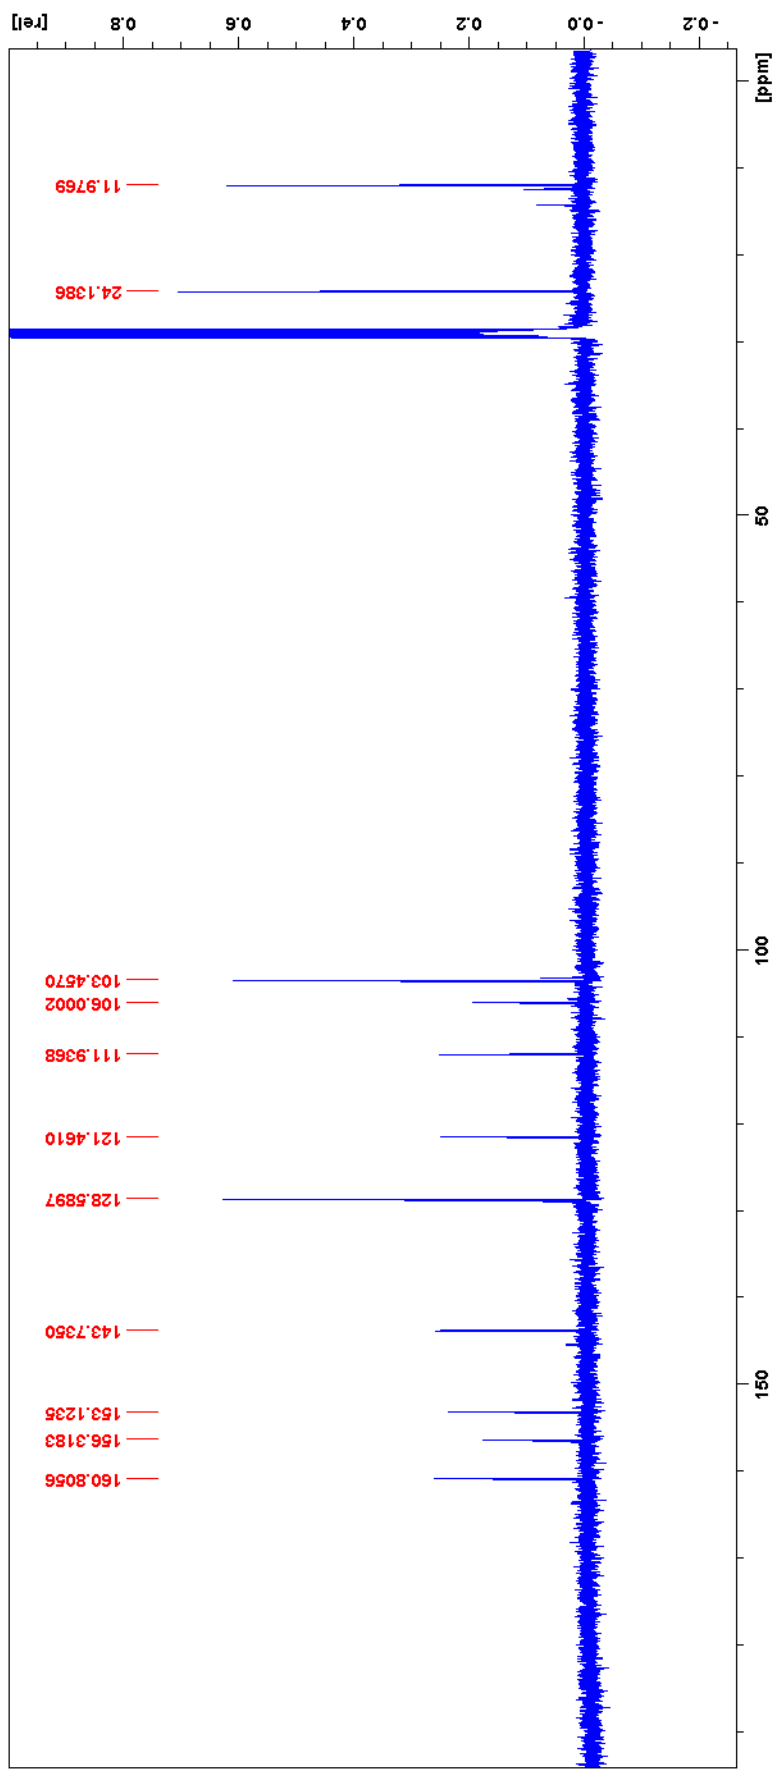

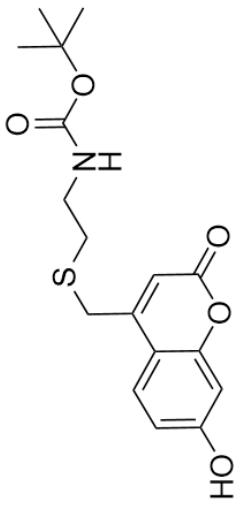

7

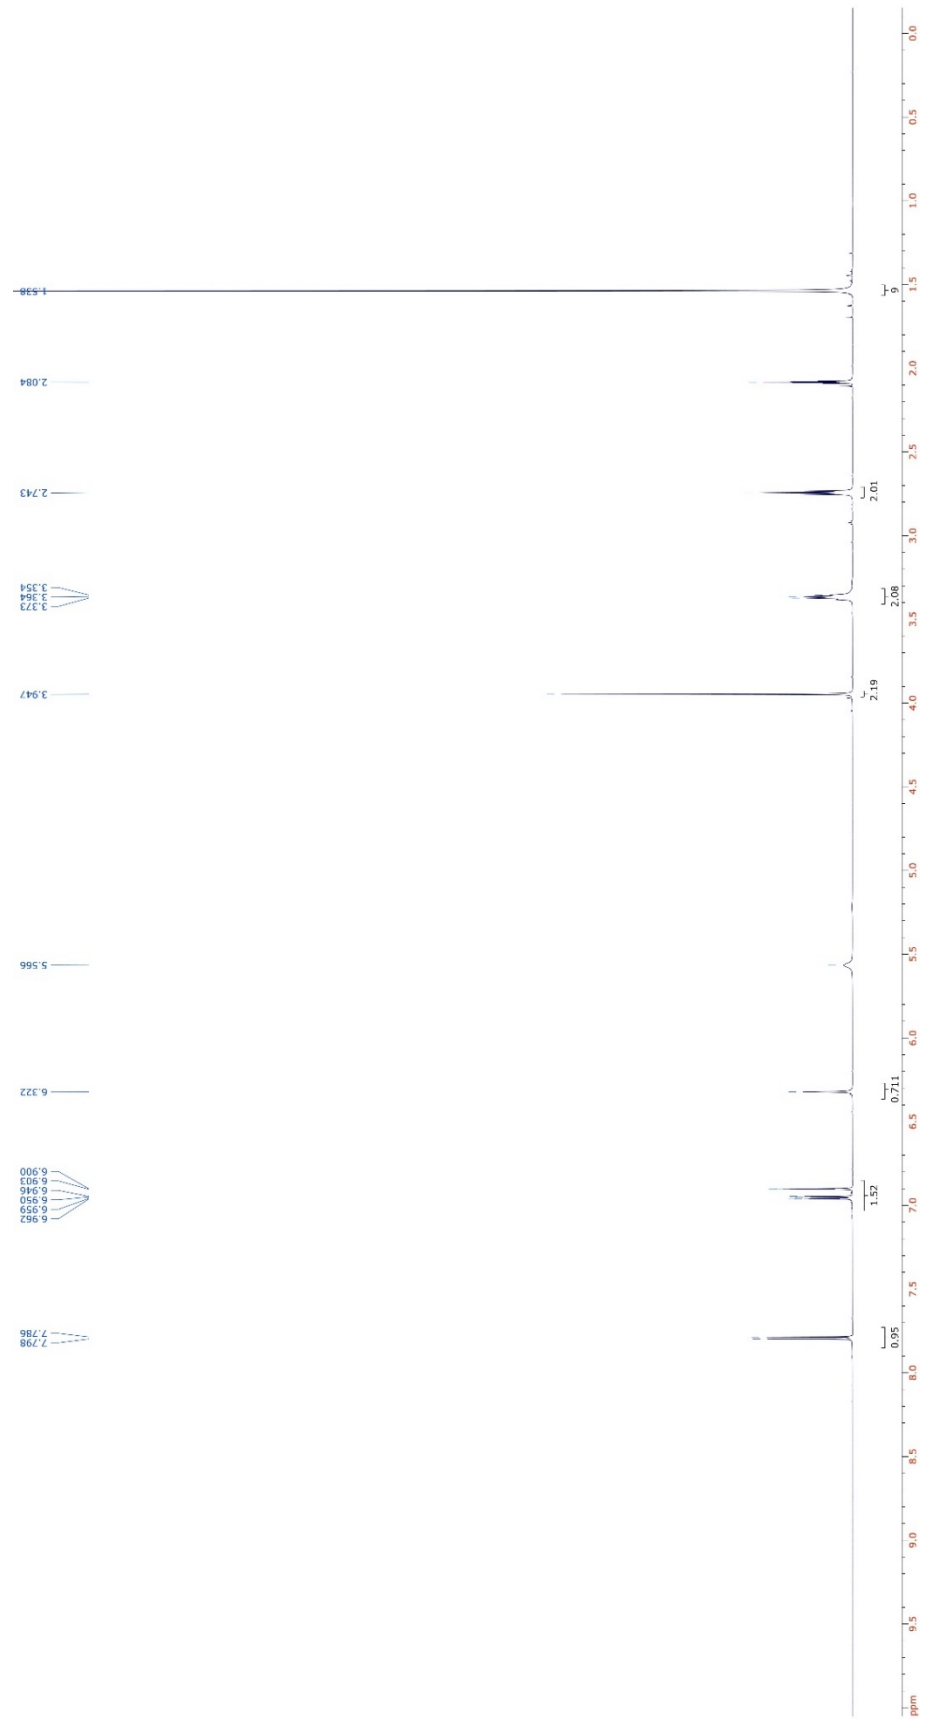

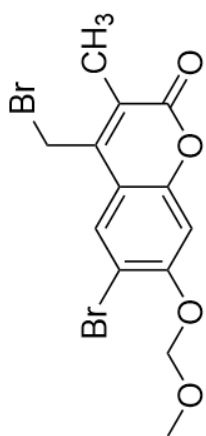

15

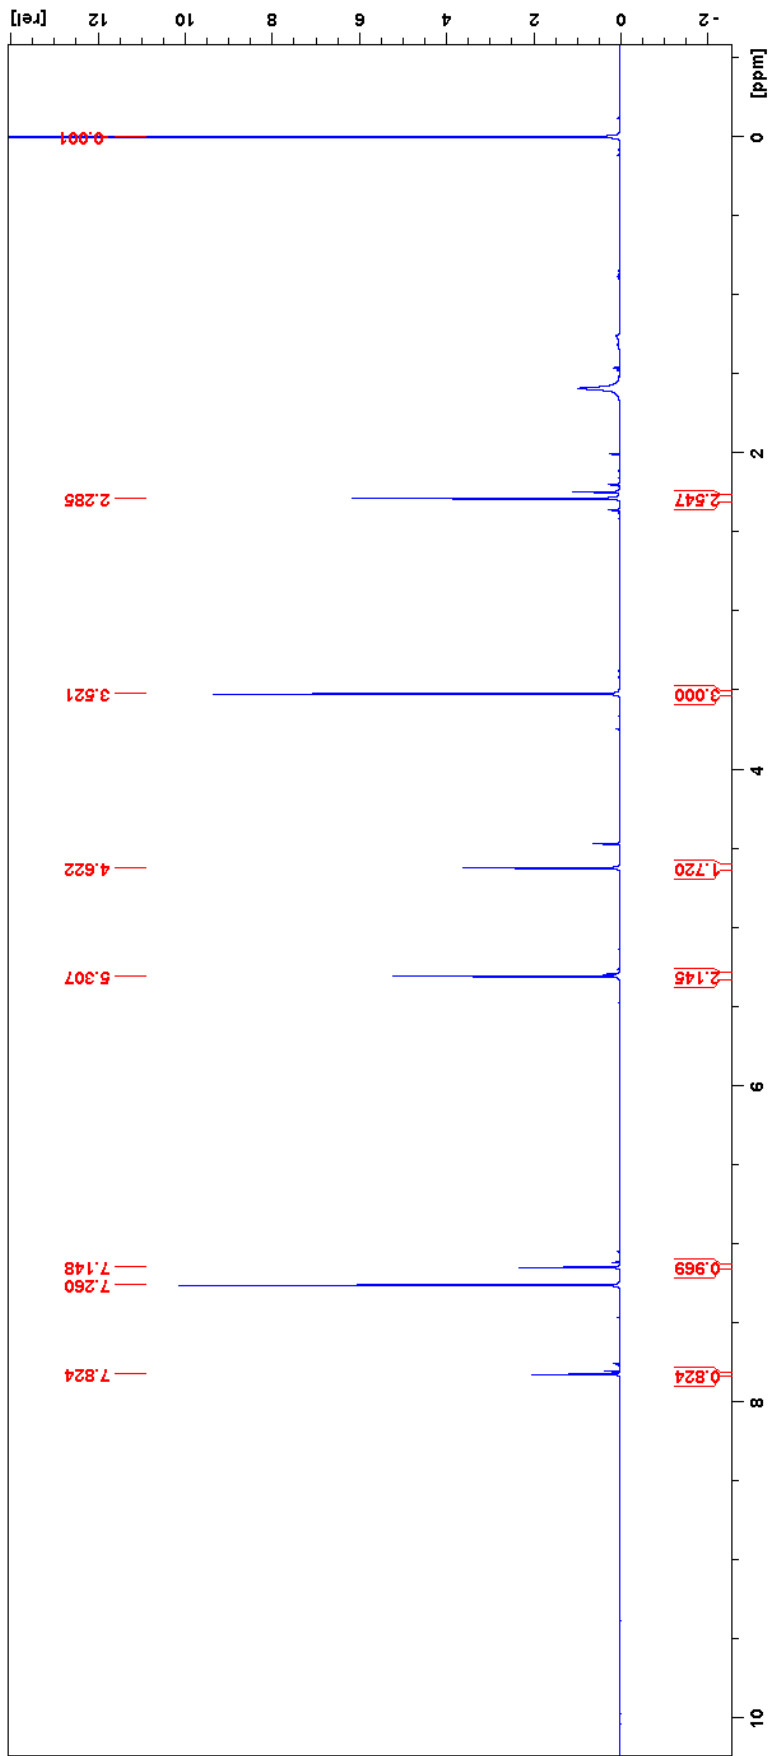

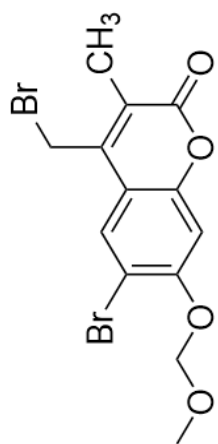

15

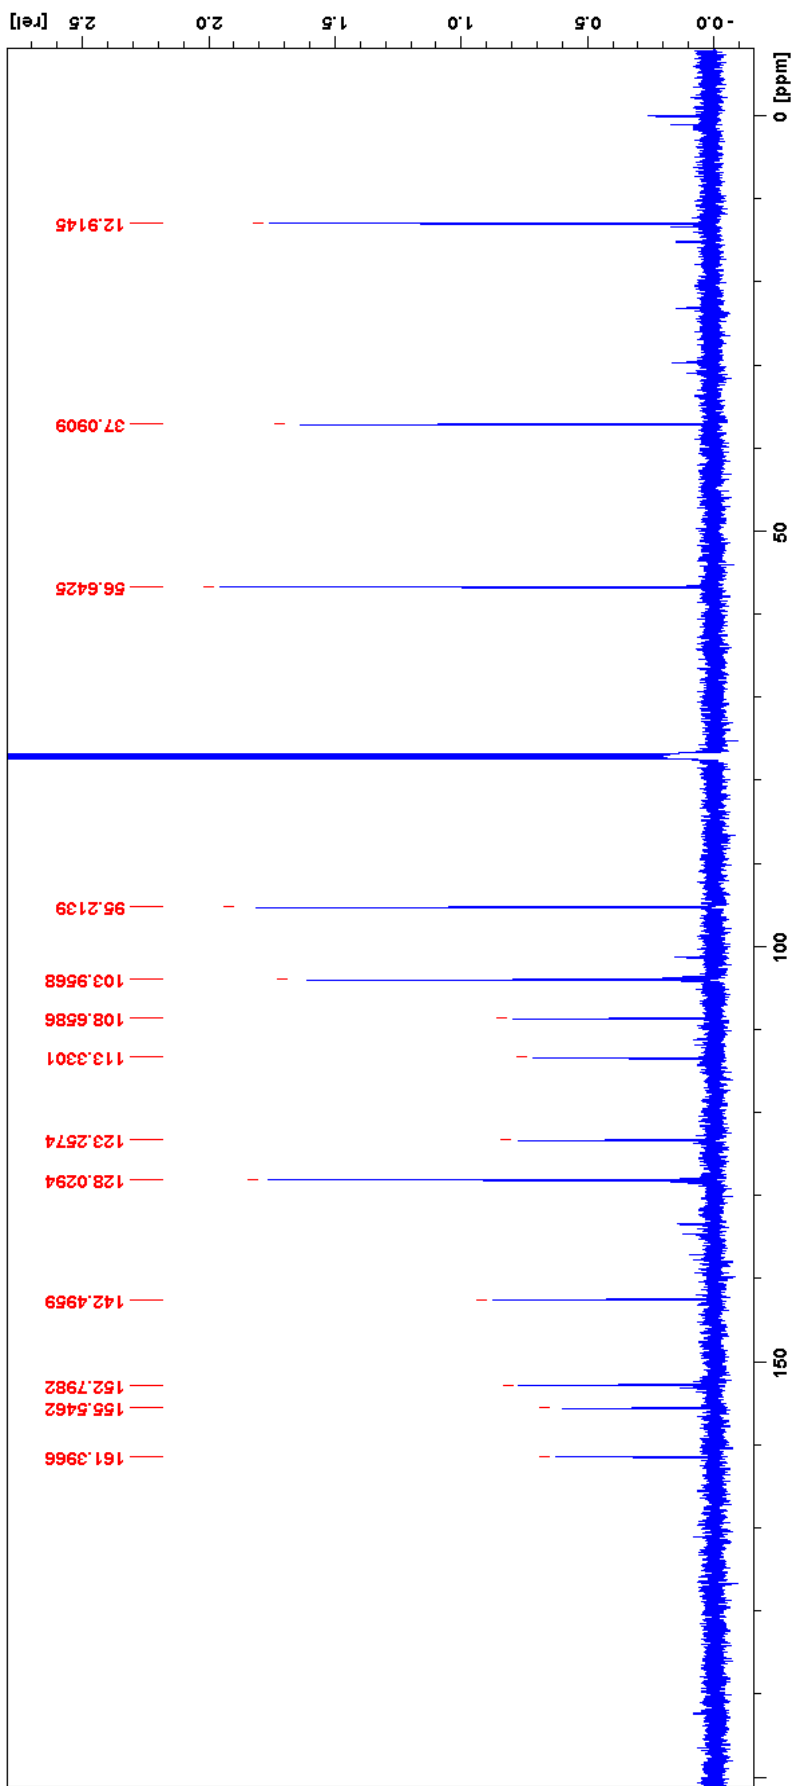



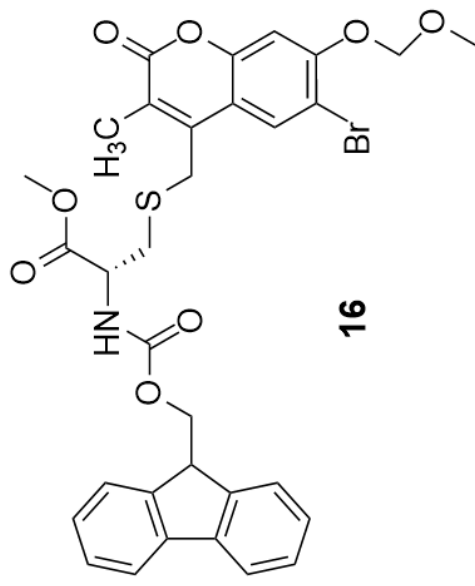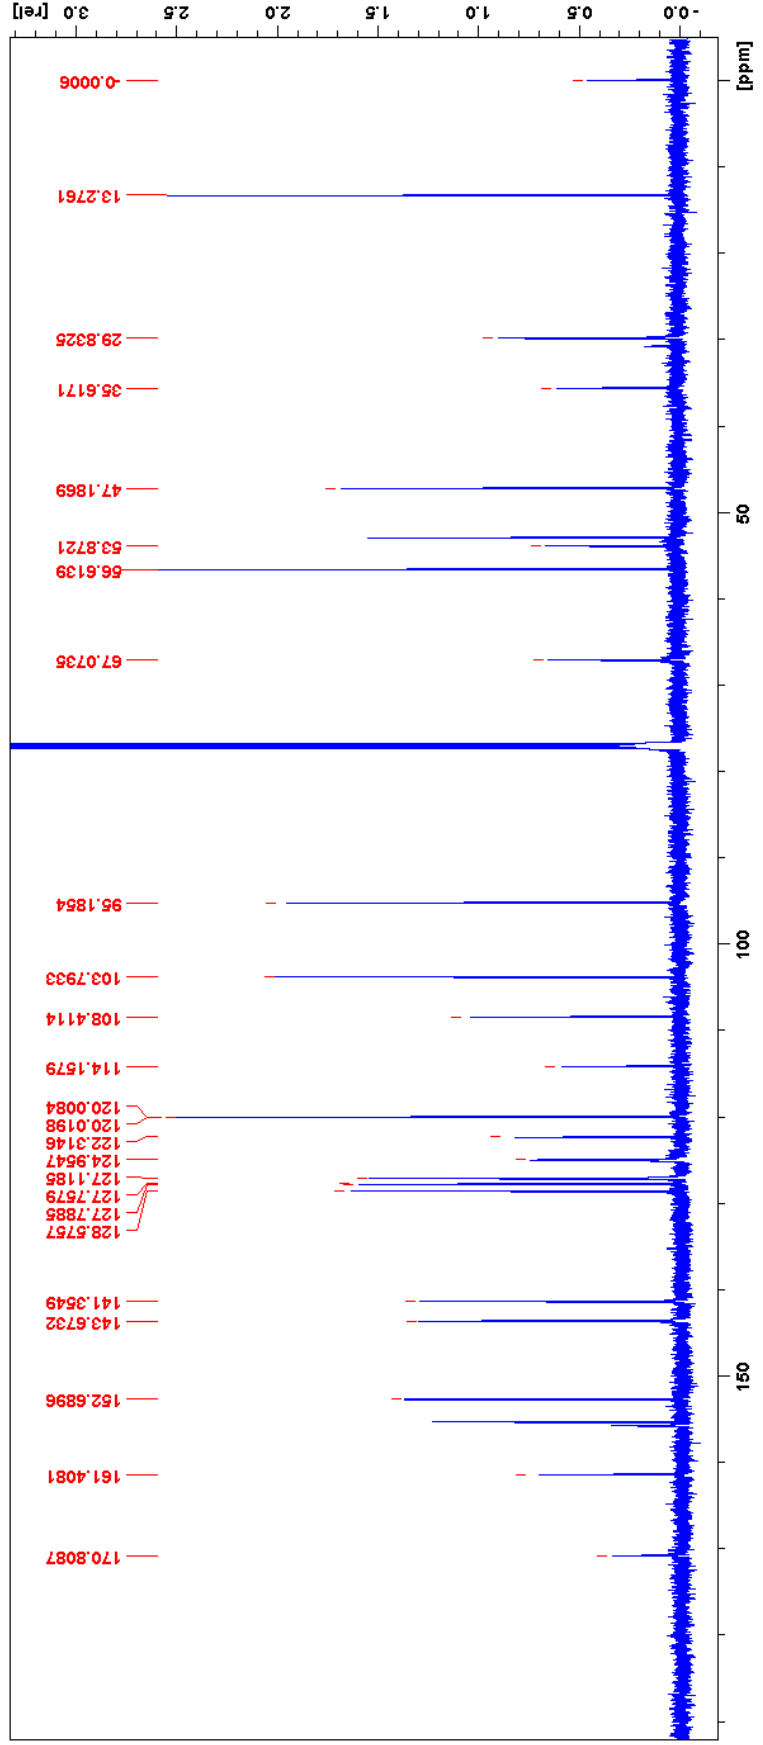

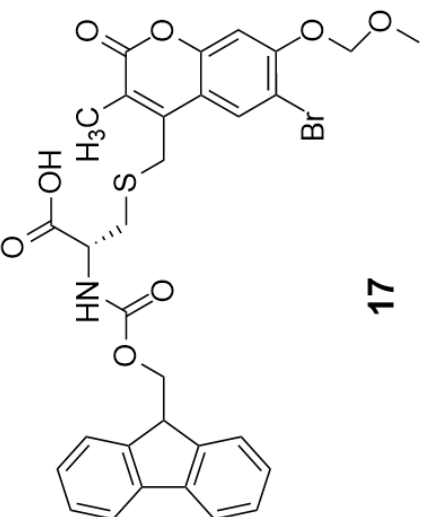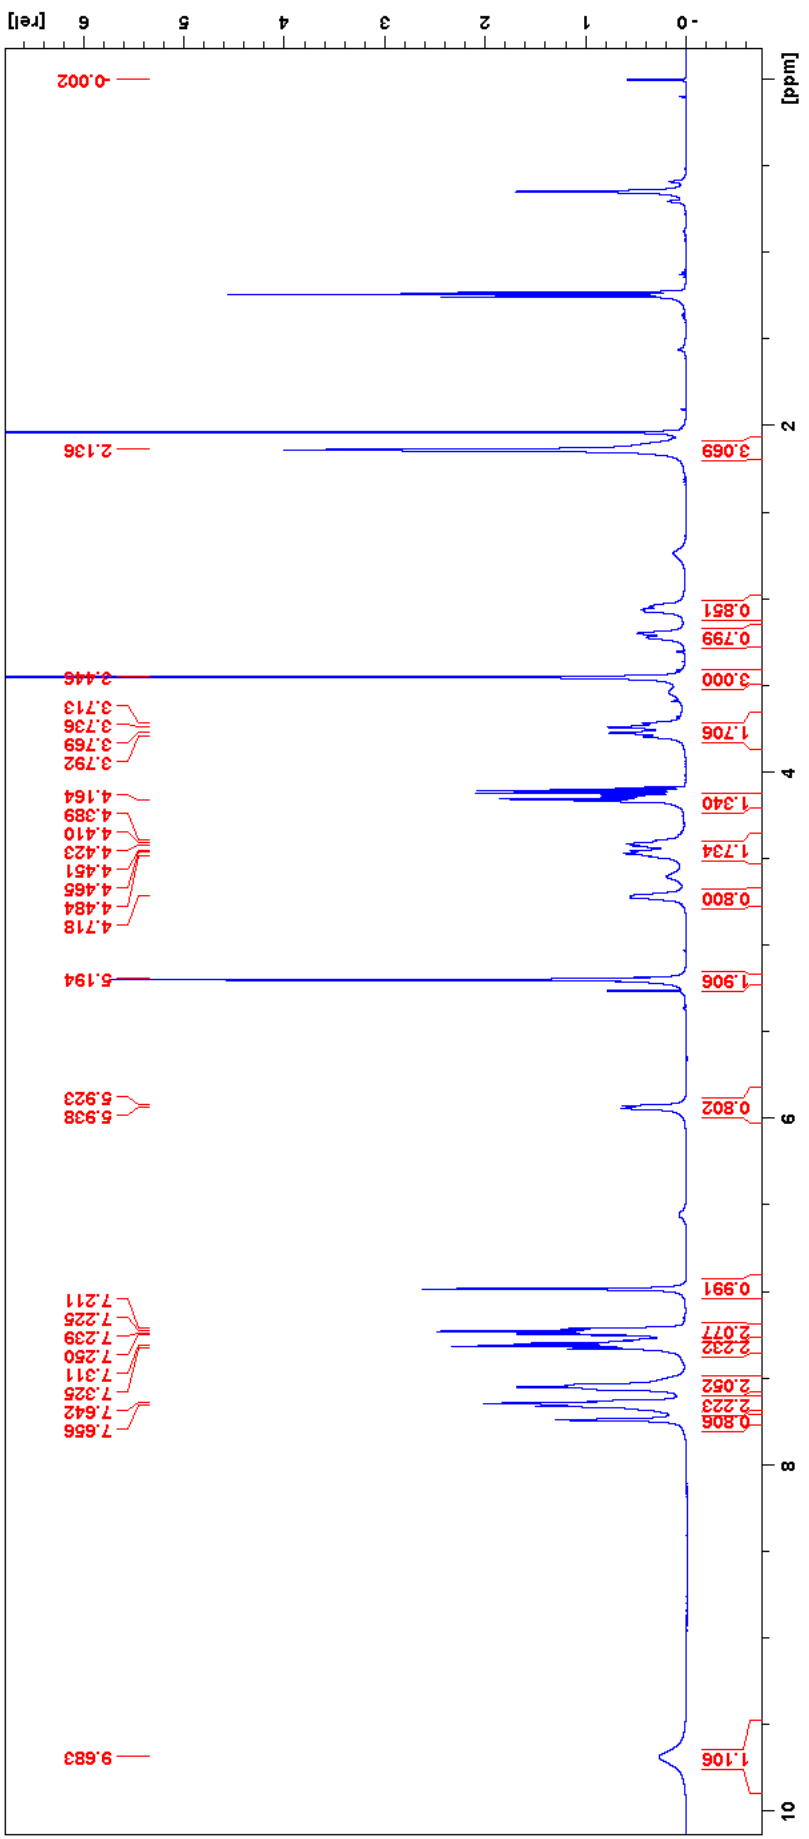

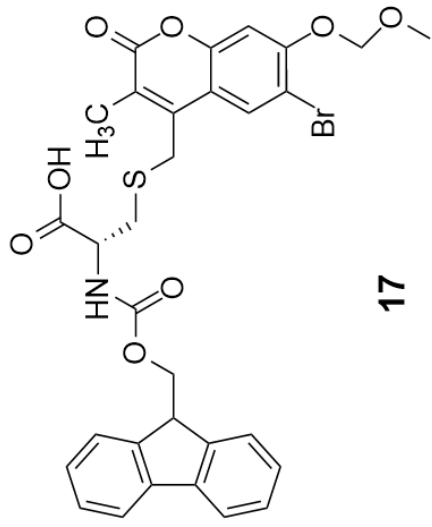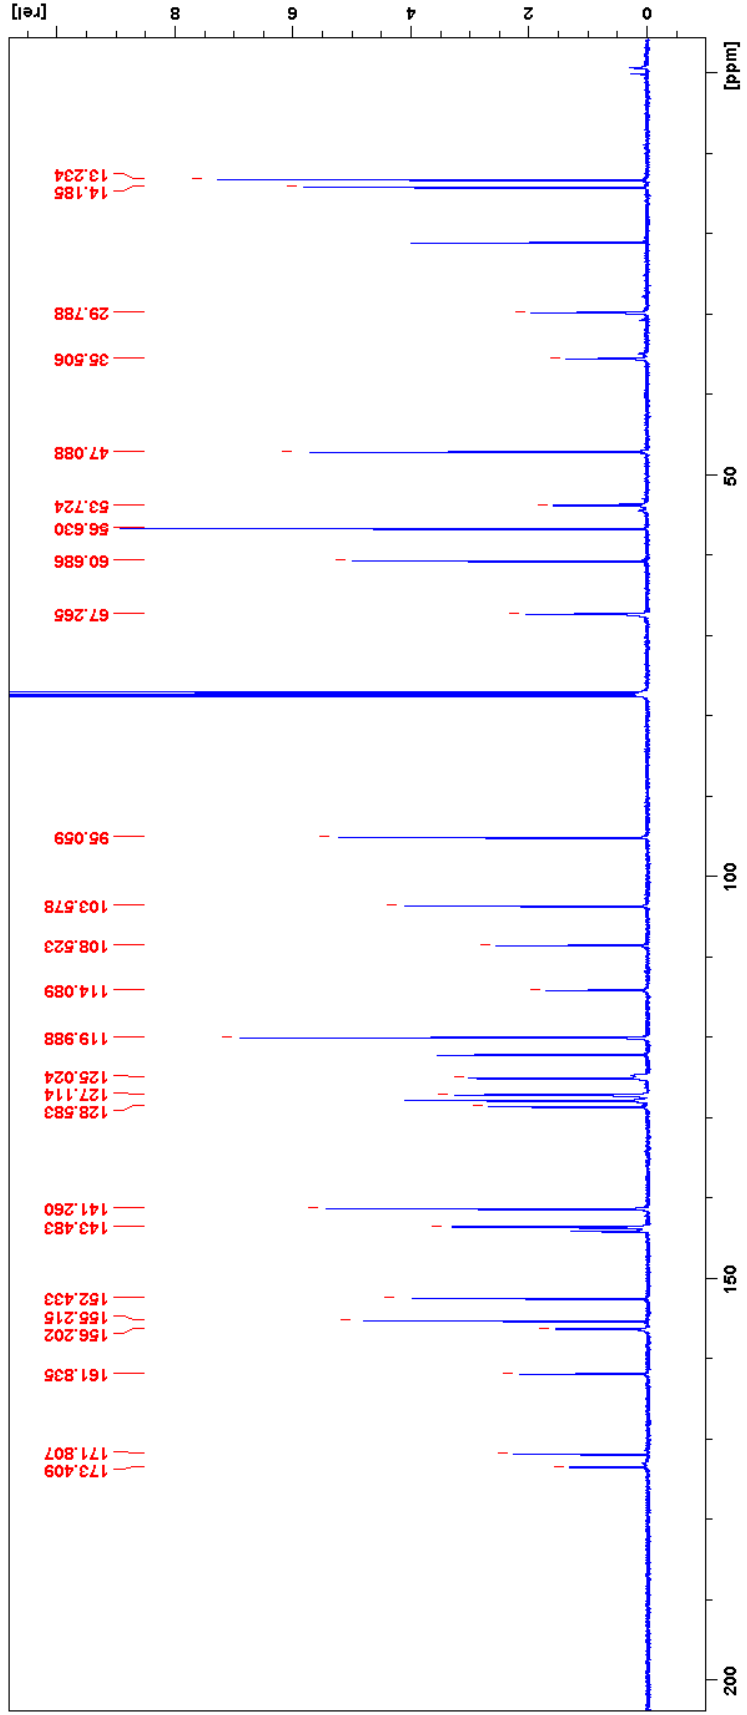



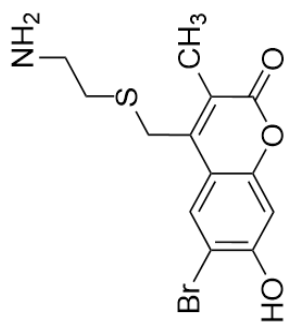

23

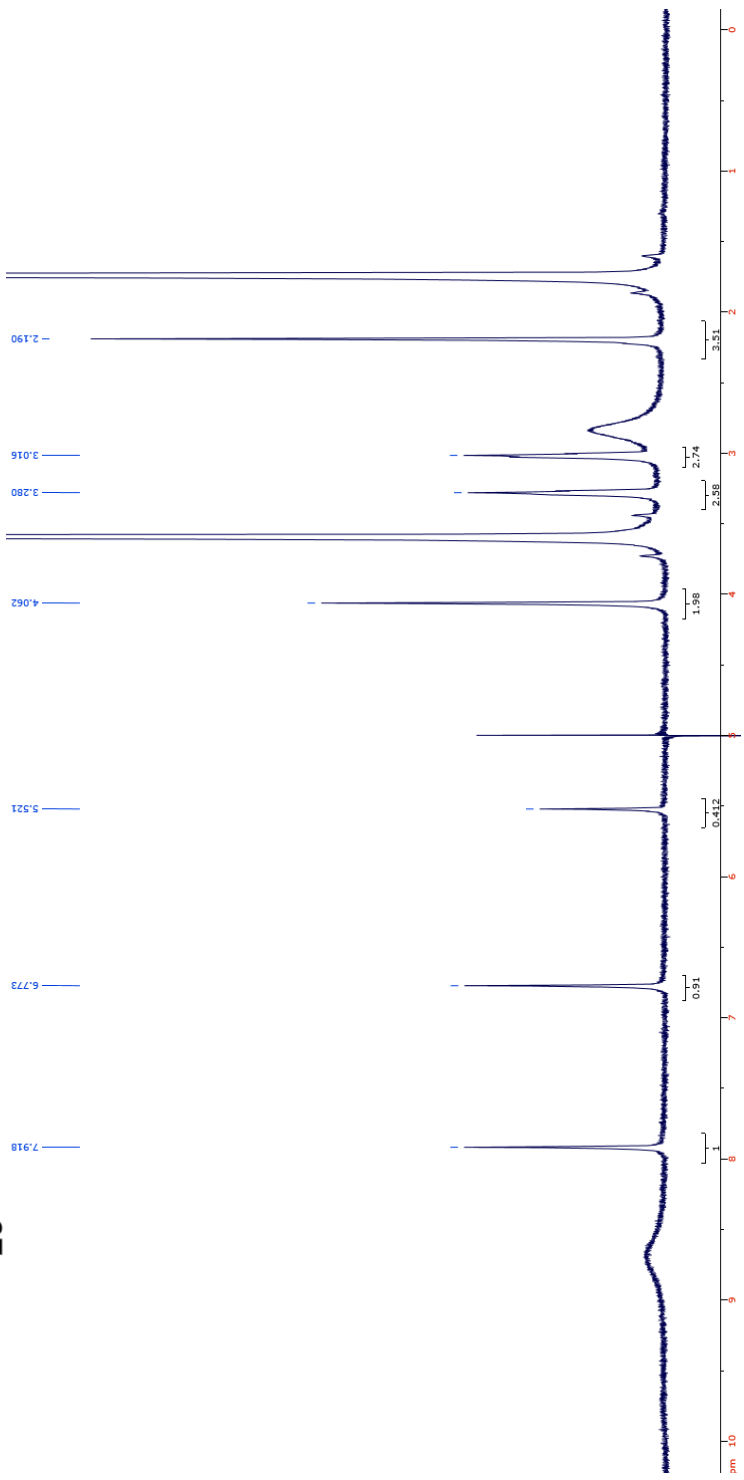

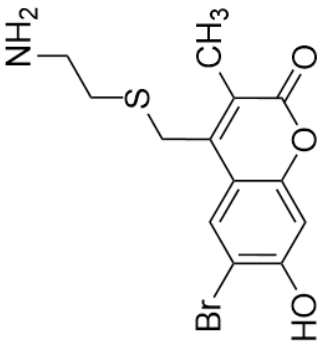

23

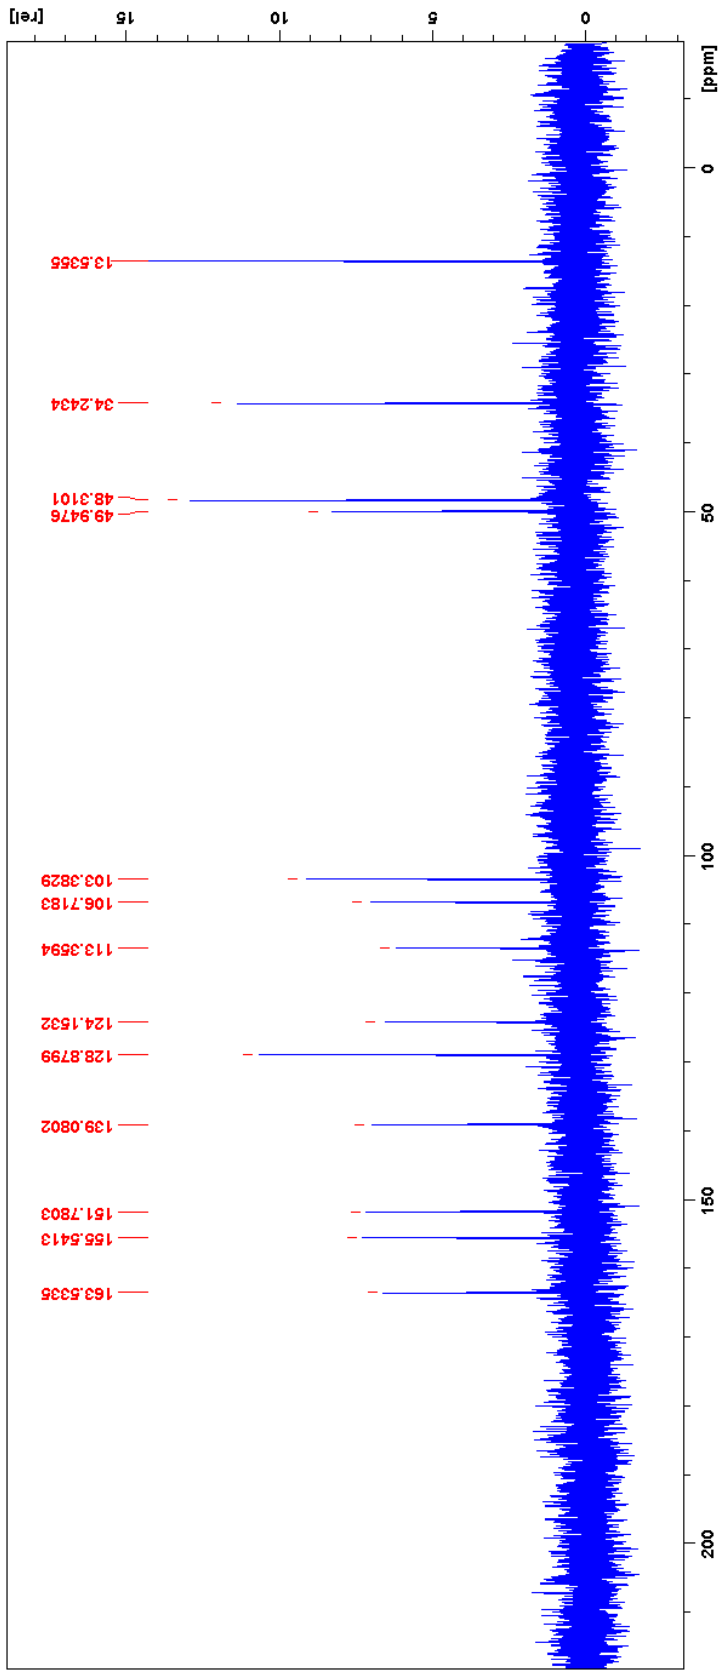

## ESI-MS data:

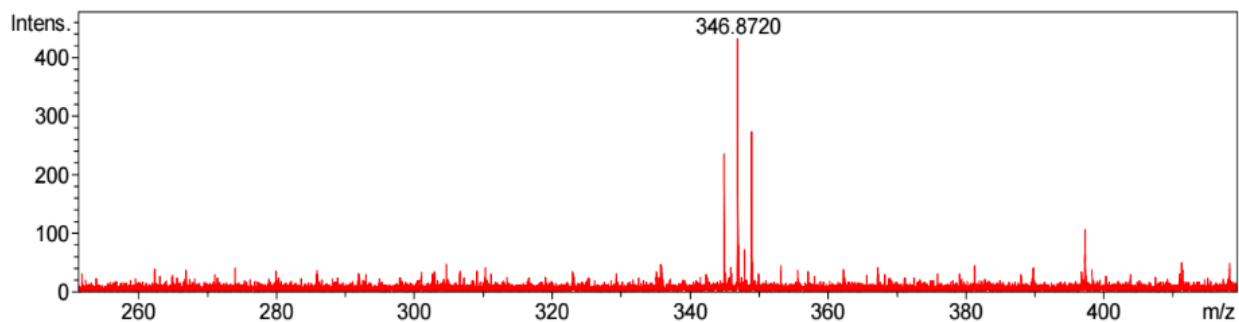

## HR-MS of Compound **3a** $[M]^{1-}$

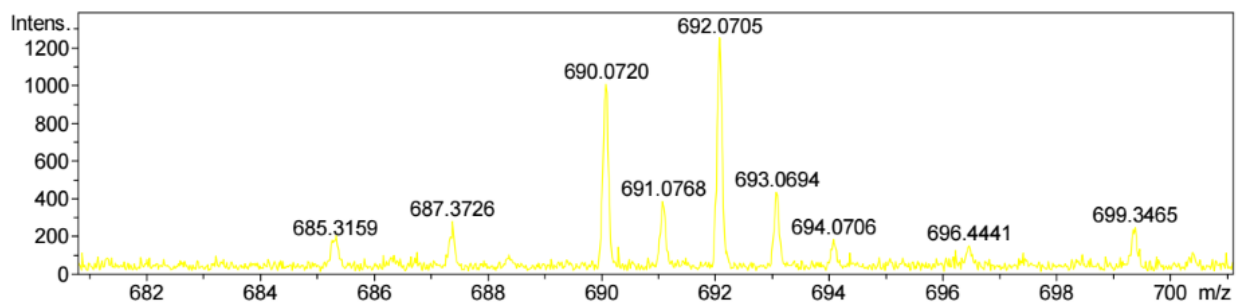

## HR-MS of Compound **16** $[M+Na]^+$

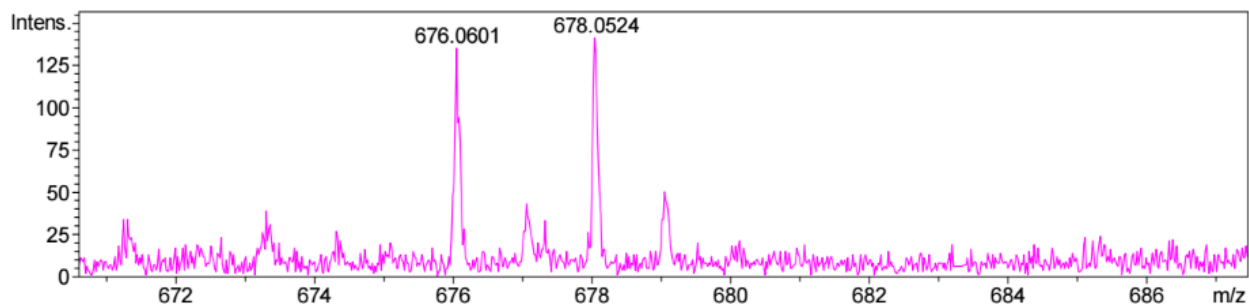

## HR-MS of Compound **17** $[M+Na]^+$

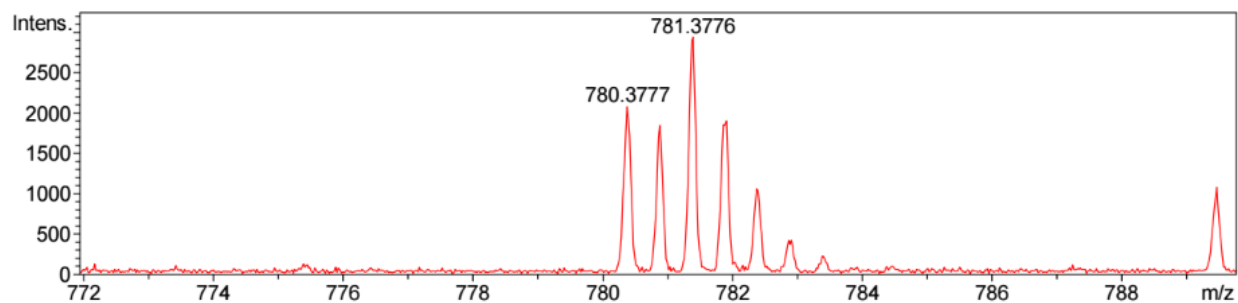

HR-MS of Compound **18**  $[M+2H]^+$

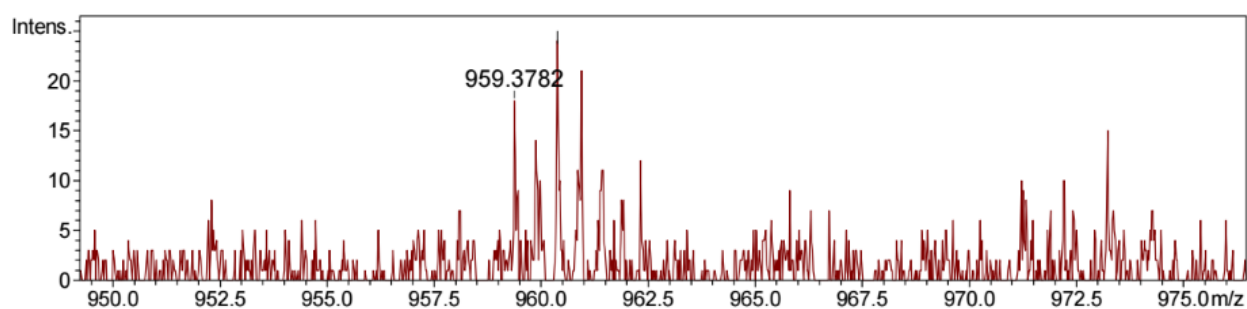

HR-MS of Compound **5-Fam-KKKSATKC(mBhc)VIM**  $[M+2H]^+$

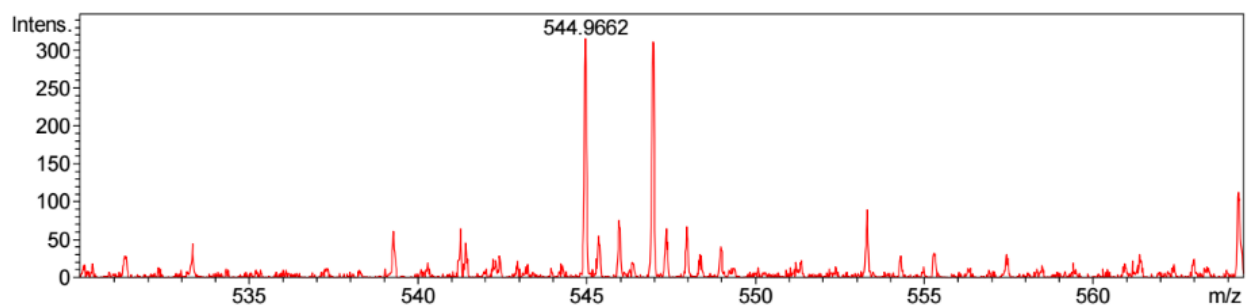

HR-MS of Compound **mBhc-NBD-cysteamine**  $[M+K]^+$

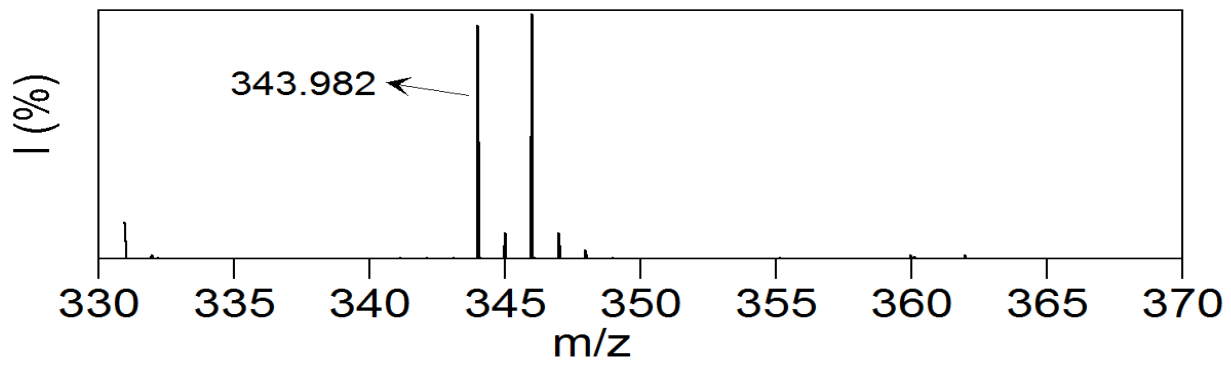

HR-MS of Compound **mBhc-cysteamine 23**  $[M+Na]^+$
